# Supplementary material
Source: PubMed Central journal article supplement (PMC4824006)

**A**

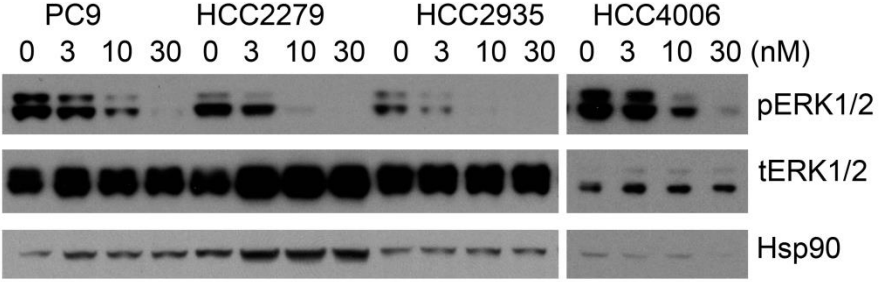

**B**

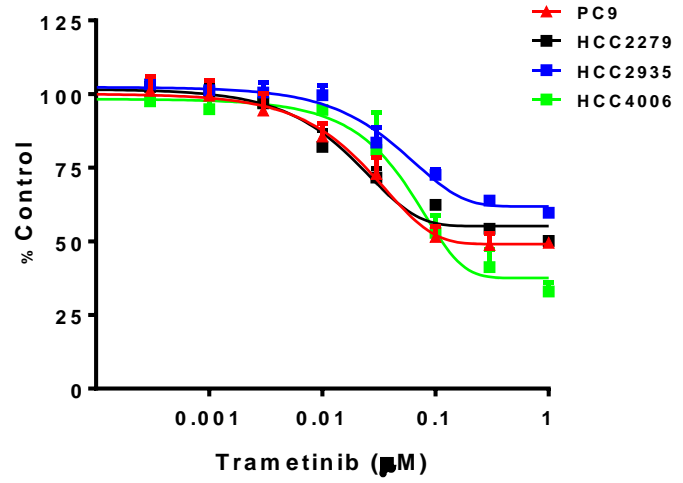

**C**

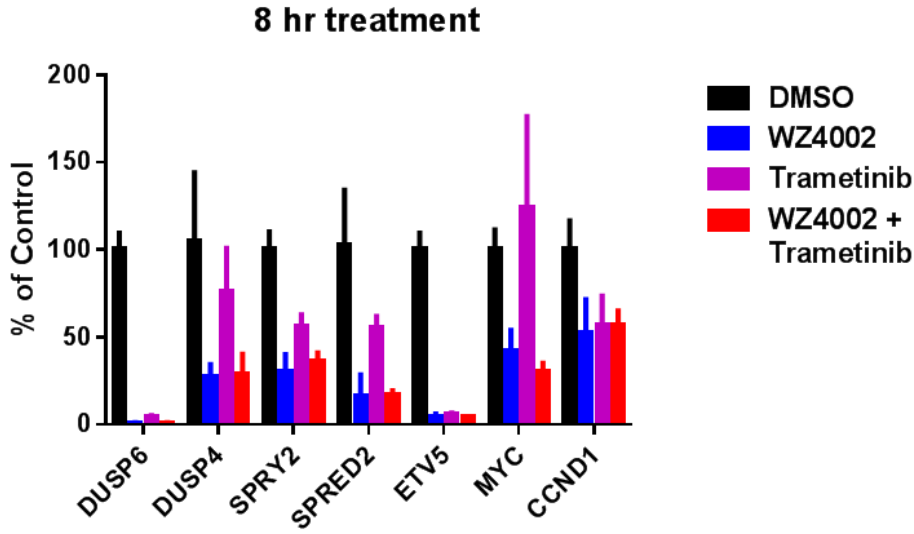

**D**

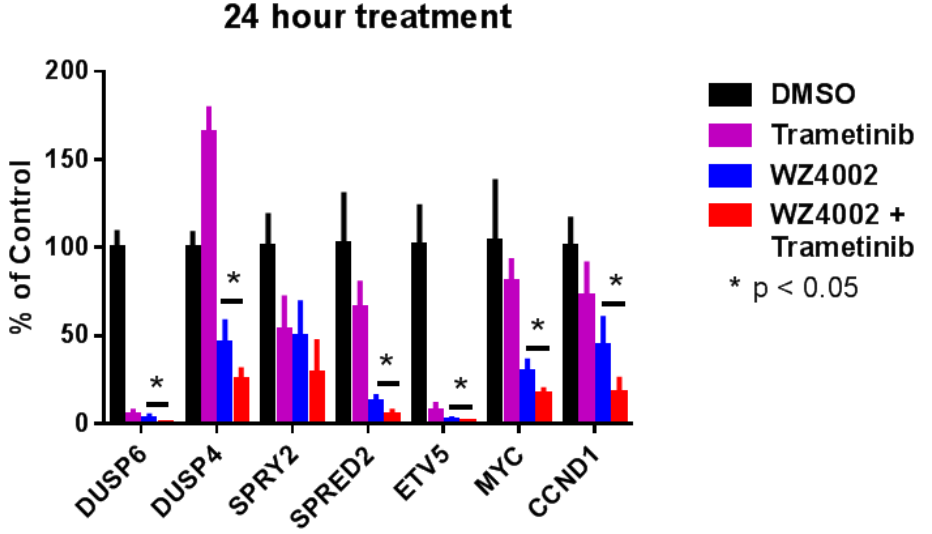

Supplement: NIHMS697802-supplement-2.pdf [file NIHMS697802-supplement-2.pdf]

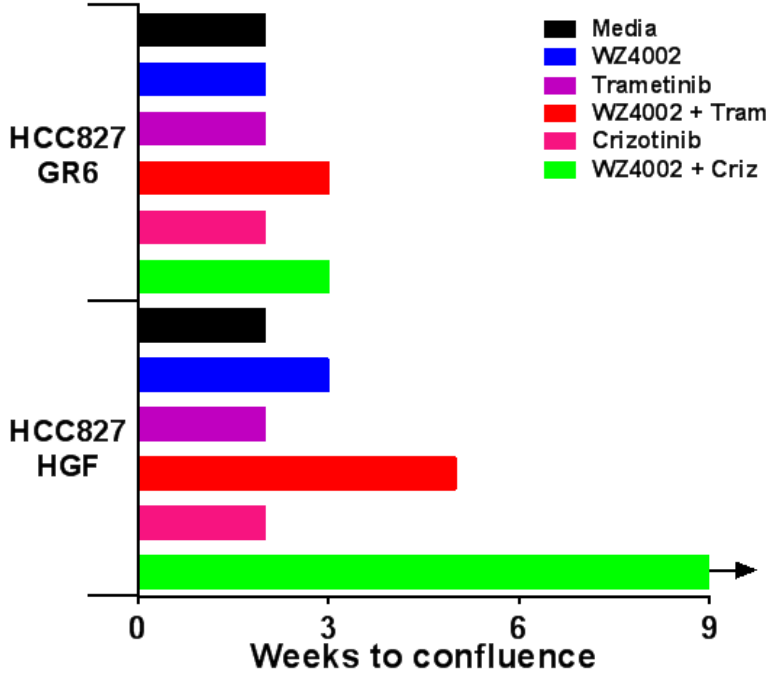

Supplement: NIHMS697802-supplement-3.pdf [file NIHMS697802-supplement-3.pdf]

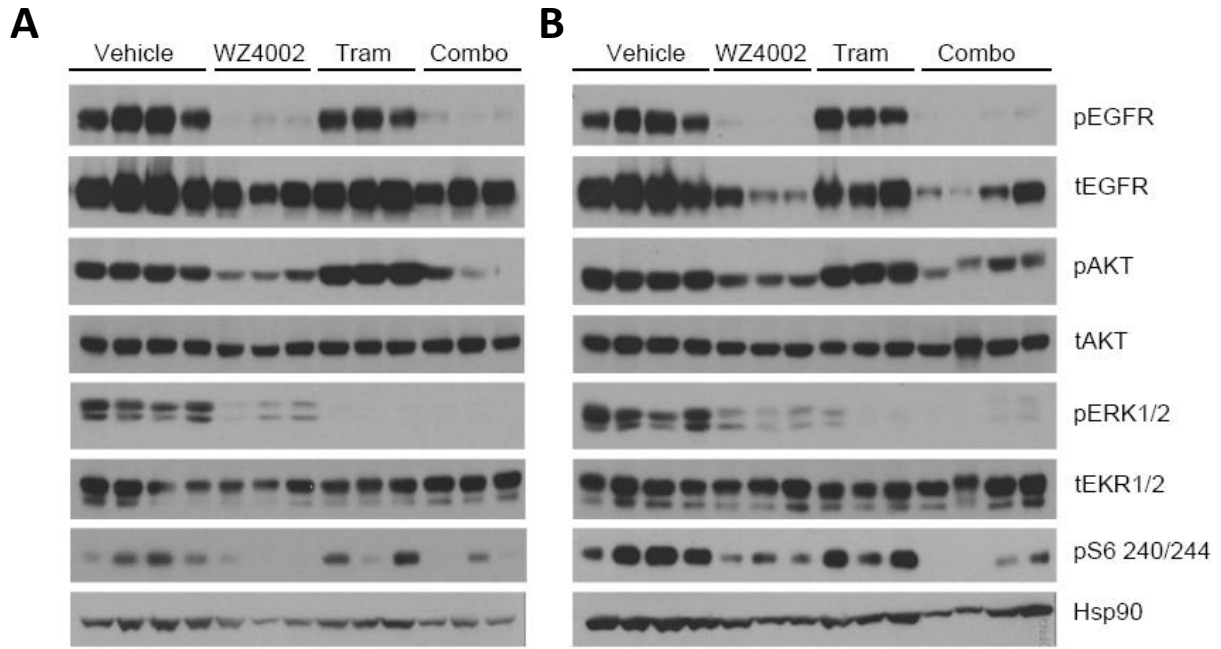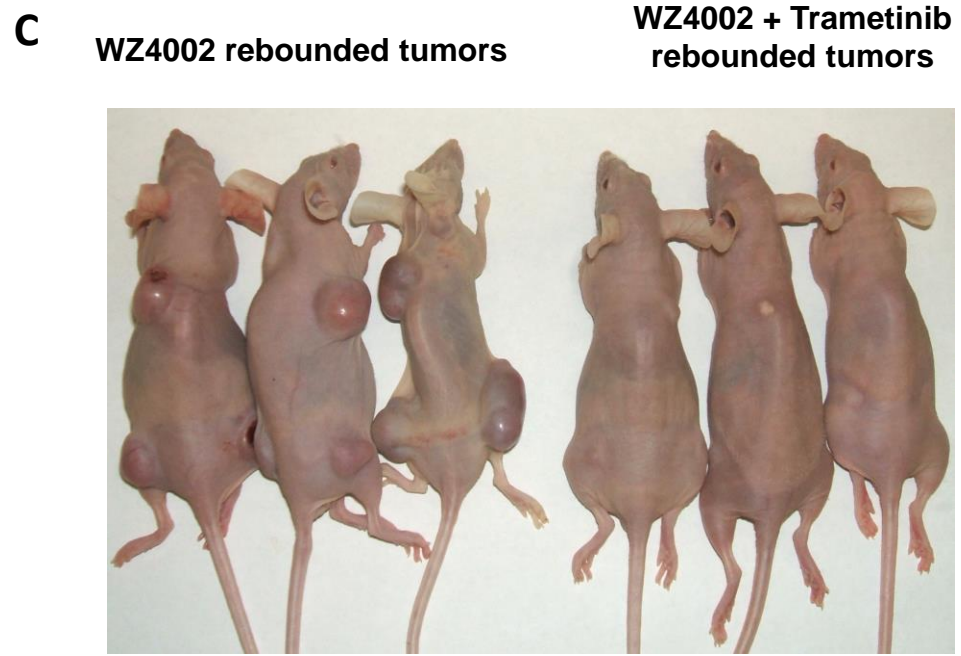

Supplement: NIHMS697802-supplement-5.pdf [file NIHMS697802-supplement-5.pdf]

**A**

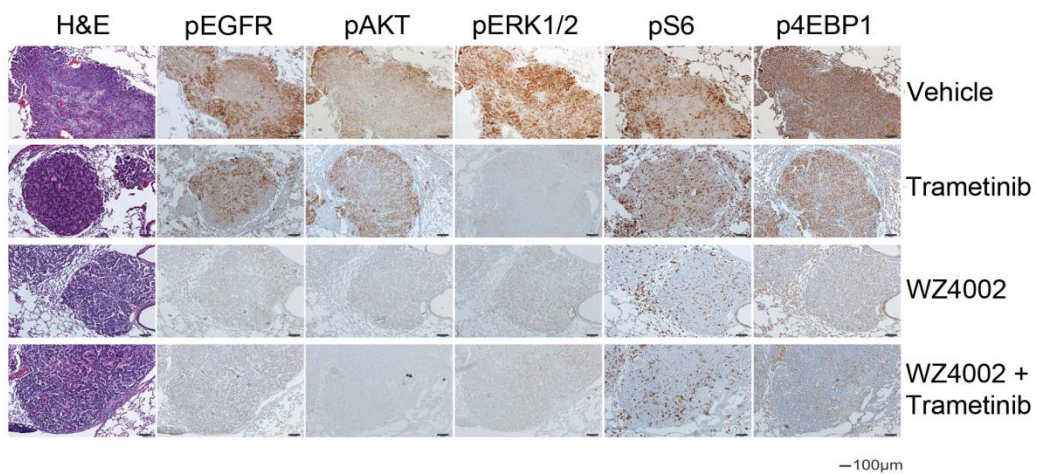

**B**

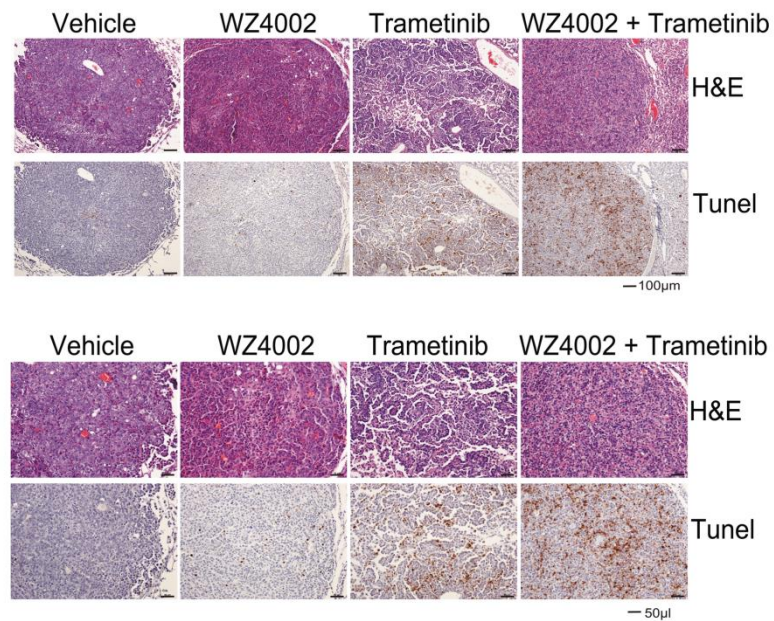

**C**

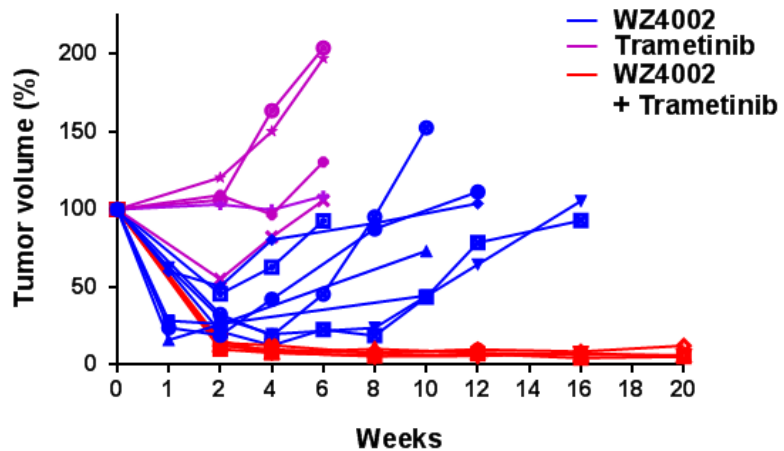

**D**

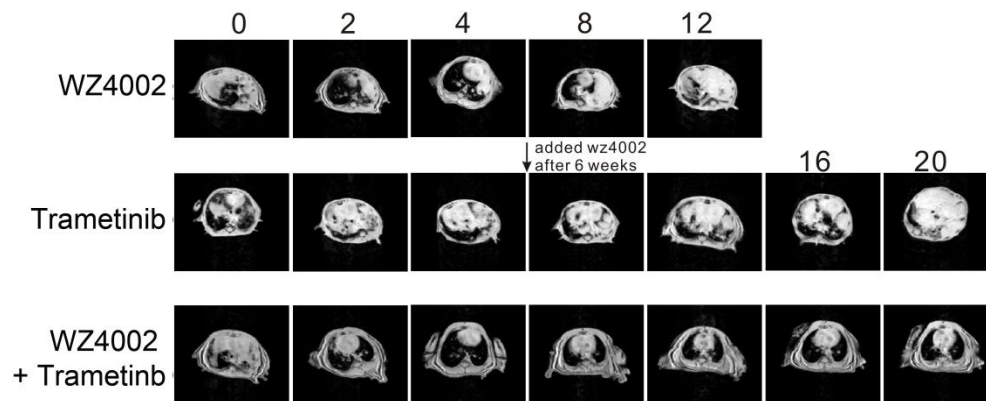

Supplement: NIHMS697802-supplement-6.pdf [file NIHMS697802-supplement-6.pdf]

**A**

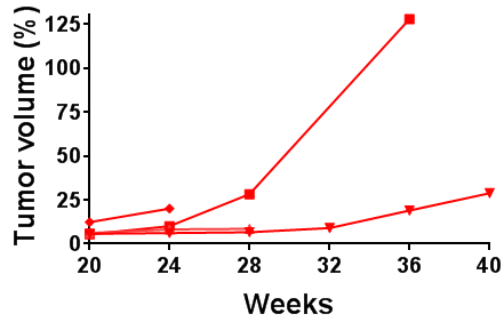

**B**

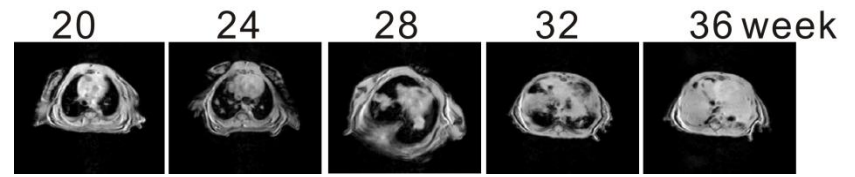

**C**

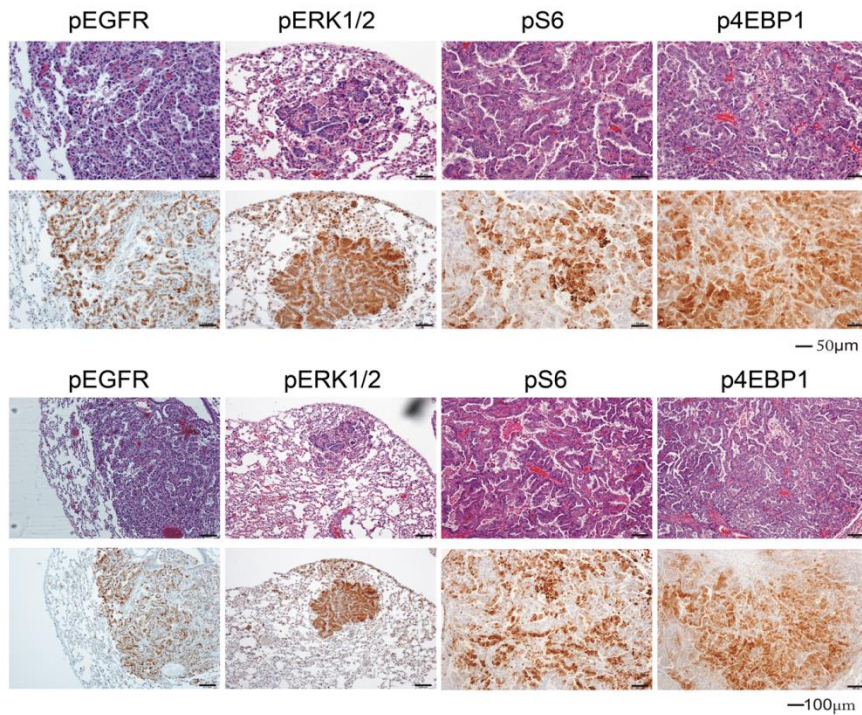

**D**

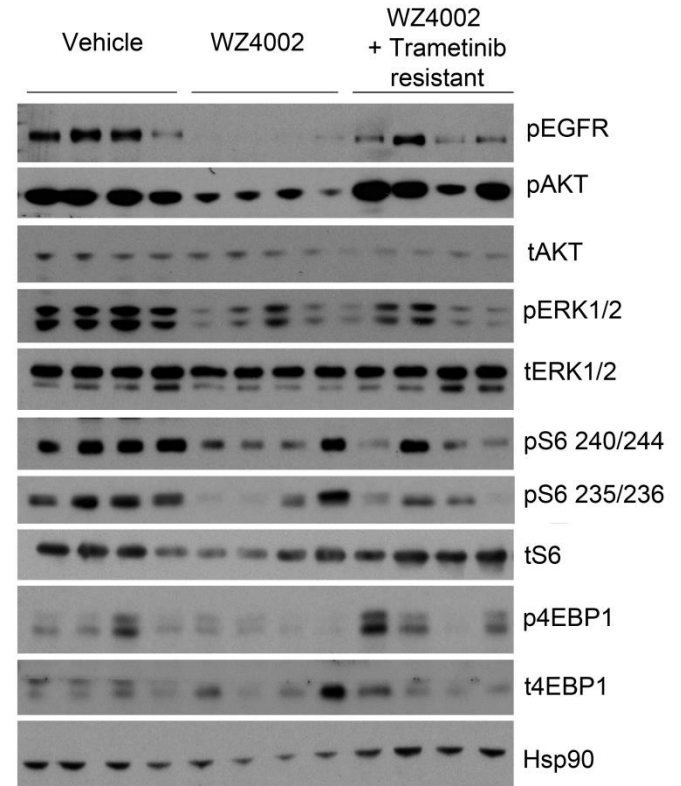

Supplement: NIHMS697802-supplement-7.pdf [file NIHMS697802-supplement-7.pdf]

A

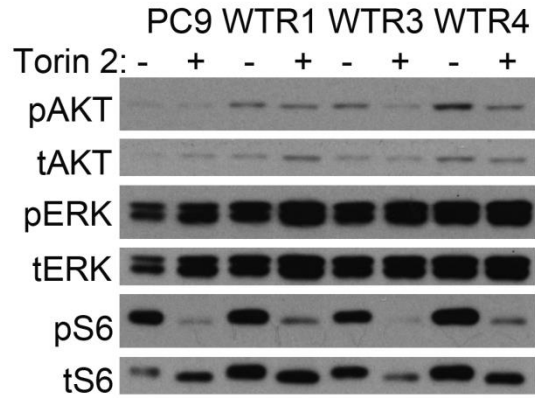

B

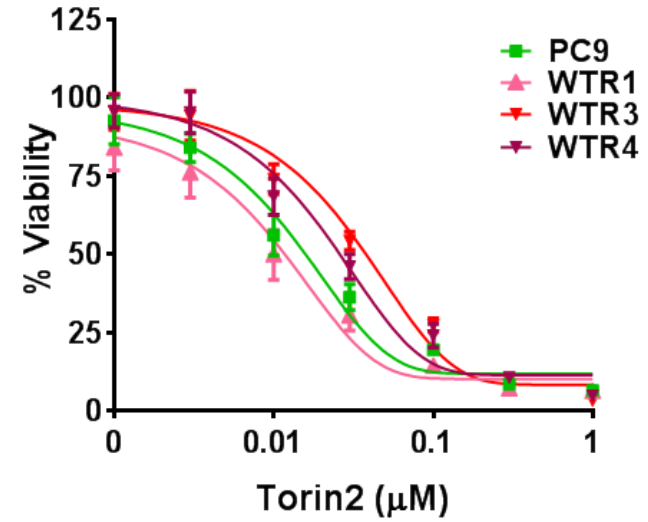

C

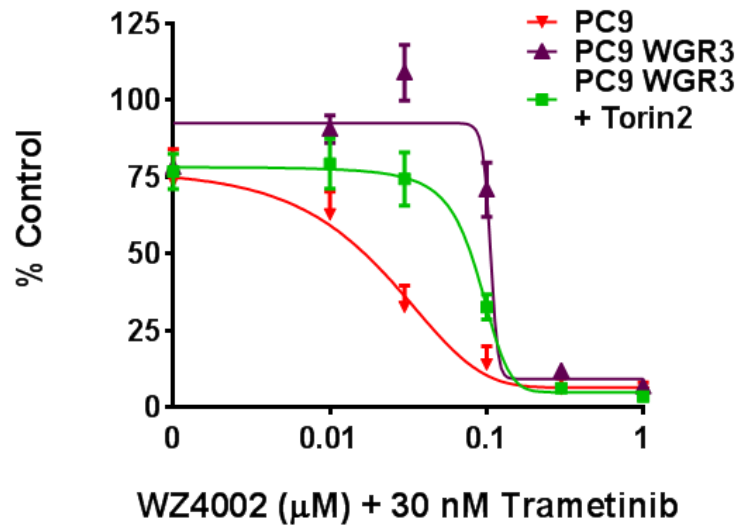

Supplement: NIHMS697802-supplement-8.pdf [file NIHMS697802-supplement-8.pdf]
